# Supplementary material for: Recovery of the three-dimensional wind and sonic temperature data from a physically deformed sonic anemometer
Source: Copernicus journal article supplement (doi:10.5194/amt-11-5981-2018), 2018-10-30
Supplement: Supplementary file 1 [file amt-11-5981-2018-supplement.zip]

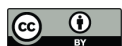

## *Supplement of*

# **Recovery of the three-dimensional wind and sonic temperature data from a physically deformed sonic anemometer**

**Xinhua Zhou et al.**

*Correspondence to:* Qinghua Yang ([yangqh25@mail.sysu.edu.cn](mailto:yangqh25@mail.sysu.edu.cn)) and Ning Zheng ([ning.zheng@campbellsci.com.cn](mailto:ning.zheng@campbellsci.com.cn))

- [amt-11-5981-2018-supplement-title-page.pdf](#)
- [AMT\\_2018\\_92\\_Data\\_Figure\\_7.xlsx](#)
- [AMT\\_2018\\_92\\_Data\\_Figure\\_8.xlsx](#)

The copyright of individual parts of the supplement might differ from the CC BY 4.0 License.
